# Supplementary material
Source: PubMed Central journal article supplement (PMC5618149)
Supplement: nn7b03717_si_001.pdf [file nn7b03717_si_001.pdf]

## Supporting Information

# Controlling Protein Surface Orientation by Strategic Placement of Oligo-Histidine Tags

*Dorothee Wasserberg, Jordi Cabanas-Danés, Jord Prangma, Shane O'Mahony, Pierre-Andre Cazade, Eldrich Tromp, Christian Blum, Damien Thompson, Jurriaan Huskens, Vinod Subramaniam, Pascal Jonkheijm.*

|                             |     |
|-----------------------------|-----|
| Scheme S1                   | S6  |
| Scheme S2                   | S7  |
| Table S1                    | S3  |
| Table S2                    | S4  |
| Table S3                    | S5  |
| Table S4, S5, S6            | S19 |
| Table S7                    | S20 |
| Figure S1                   | S2  |
| Figure S2                   | S9  |
| Figure S3, S4               | S10 |
| Figure S5, S6               | S11 |
| Figure S7                   | S12 |
| Figure S8                   | S13 |
| Figure S9                   | S14 |
| Figure S10                  | S15 |
| Figure S11                  | S16 |
| Figure S12                  | S17 |
| Figure S13                  | S18 |
| Figure S14                  | S20 |
| Figure S15                  | S21 |
| Equation S1, S2, S3, S4, S5 | S8  |

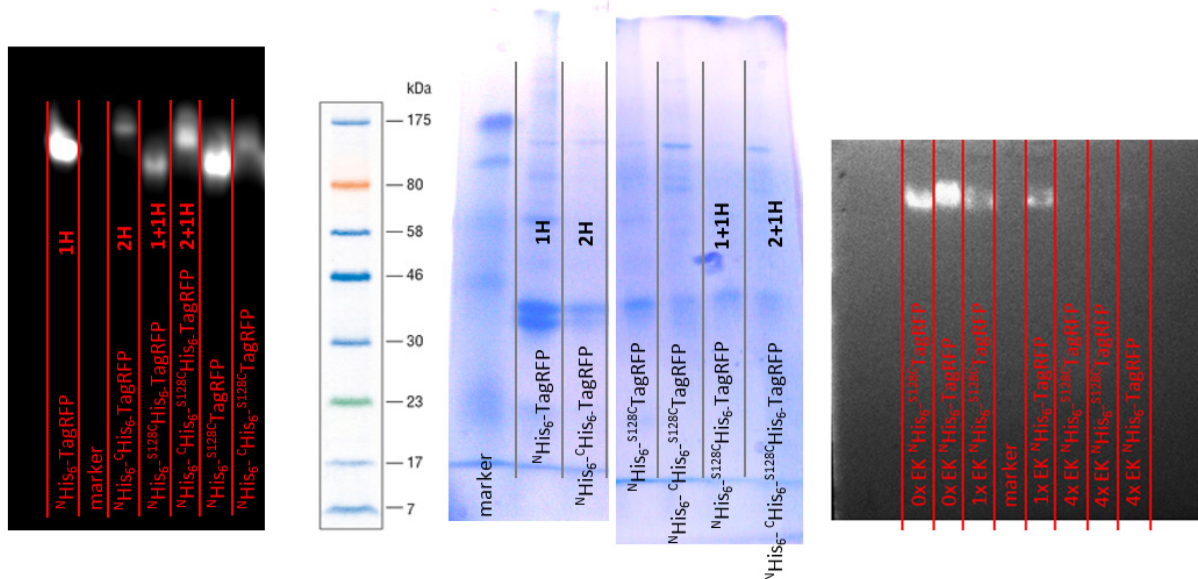

**Figure S1.** (Left) Fluorescence image ( $\lambda_{\text{ex}} = 535 \text{ nm}$ ,  $\lambda_{\text{em}} = 600 \text{ nm}$ ) of a native PAGE-gel loaded with relevant mutants and variants of TagRFP as indicated. (Middle) Color image of an SDS-PAGE-gel loaded with relevant mutants and variants of TagRFP as indicated, included are the bands of the prestained protein ladder used (marker). (Right) Bioluminescence (luminol) image of a Western blot from a PAGE-gel, loaded with digestion products of enterokinase (EK) digests of different TagRFP variants (as indicated), stained with primary mouse anti- $\text{His}_6$  antibody (Ab) and secondary HRP-conjugated anti-mouse Ab. 0xEK, 1xEK and 4xEK denote the equivalents of enterokinase used to cleave the proteins' N-terminal  $\text{His}_6$ -tag at the DDDDK enterokinase recognition site.

**Table S1.** Spectroscopic and mass spectrometric data for TagRFP variants: absorption and emission maxima in nm, fluorescence lifetimes in ns, calculated masses in g/mol, and masses determined by MALDI-TOF MS in m/z.

| protein variant                                                                                                           | absorption maximum<br>(nm) | emission maximum<br>(nm) | fluorescence lifetime<br>(ns) | mass calculated<br>(g/mol) | mass measured<br>(m/z) |
|---------------------------------------------------------------------------------------------------------------------------|----------------------------|--------------------------|-------------------------------|----------------------------|------------------------|
| <sup>N</sup> His <sub>6</sub> - <sup>wt</sup> TagRFP                                                                      | 555                        | 582                      | 2.4                           | 30309                      | 30350                  |
| <sup>N</sup> His <sub>6</sub> -TagRFP ( <b>1H</b> )                                                                       | 555                        | 579                      | 2.4                           | 30277                      | 30000                  |
| <sup>N</sup> His <sub>6</sub> - <sup>C</sup> His <sub>6</sub> -TagRFP ( <b>2H</b> )                                       | 555                        | 582                      | 2.4                           | 31100                      | 30400                  |
| <sup>N</sup> His <sub>6</sub> - <sup>S128C</sup> His <sub>6</sub> -TagRFP ( <b>1+1H</b> )                                 | 555                        | 585                      | 2.4                           | 31116                      | 30800                  |
| <sup>N</sup> His <sub>6</sub> - <sup>C</sup> His <sub>6</sub> - <sup>S128C</sup> His <sub>6</sub> -TagRFP ( <b>2+1H</b> ) | -                          | -                        | -                             | 32164                      | 31700                  |

**Table S2.** Fitted parameters of the mono-exponential fit to the anisotropy decay in time from integrated fluorescence polarization lifetime images: lifetime in ns and sum of the peak intensities of the parallel and perpendicular time traces in  $10^4$  cts.

| Data set              | Lifetime<br>(ns) | Peak<br>Intensities<br>( $10^4$ cts) |
|-----------------------|------------------|--------------------------------------|
| <b>2H sample 1</b>    | 0.84             | 12                                   |
| <b>2H sample 2</b>    | 6.5              | 14                                   |
| <b>2H sample 3</b>    | 1.1              | 9.3                                  |
| <b>2H sample 4</b>    | 0.86             | 15                                   |
| <b>2+1H sample 5</b>  | 25.5             | 1.34                                 |
| <b>2+1H sample 6</b>  | 20.9             | 1.6                                  |
| <b>2+1H sample 7</b>  | 17.9             | 1.7                                  |
| <b>2+1H sample 8</b>  | 17.1             | 2.98                                 |
| <b>2+1H sample 9</b>  | 43.4             | 3.09                                 |
| <b>2+1H sample 10</b> | 17.6             | 1.68                                 |
| <b>2+1H sample 11</b> | 34.9             | 1.58                                 |

**Table S3.** Dimensionless experimental and expected (calculated) ratios of relative abundances (averages of fits to three separate scans) from XPS of sulfur to carbon (S/C) and where present sulfur to nitrogen (S/N) in monolayers on gold covered glass substrates.

| XPS samples                                 |              | S/C   | S/N  |
|---------------------------------------------|--------------|-------|------|
| 1. MUA                                      | experimental | 0.050 | n.a. |
|                                             | calculated   | 0.090 | n.a. |
| 2. NHS-activated MUA                        | experimental | 0.067 | 1.62 |
|                                             | calculated   | 0.056 | 1.00 |
| 3. NTA-NH <sub>2</sub> -functionalized MUA  | experimental | 0.051 | 2.70 |
|                                             | calculated   | 0.047 | 0.50 |
| 4. Ni <sup>2+</sup> :NTA-functionalized MUA | experimental | 0.040 | 10.7 |
|                                             | calculated   | 0.047 | 0.50 |

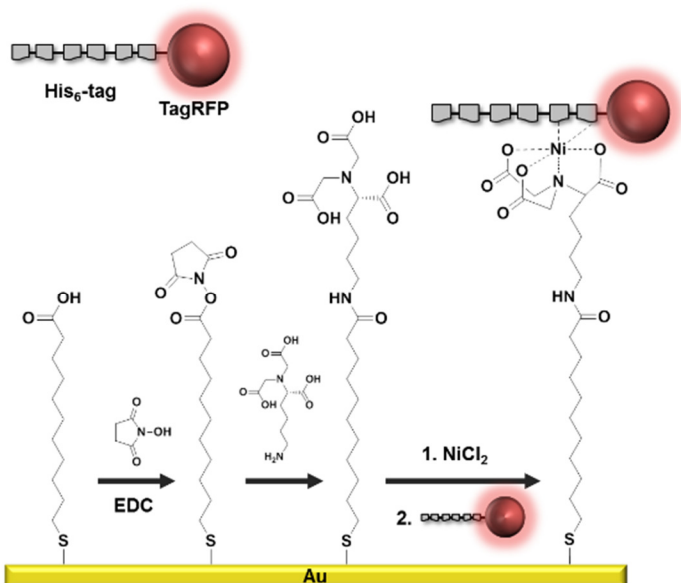

**Scheme S1.** Schematic representation of the functionalization of gold substrates with  $\text{Ni}^{2+}$ :NTA for protein immobilization via a 11-mercaptoundecanoic acid (MUA) self-assembled monolayer (SAM) on gold, activation with NHS/EDC, subsequent immobilization of  $\text{N}_{\alpha},\text{N}_{\alpha}$ -bis(carboxymethyl)-L-lysine (NTA- $\text{NH}_2$ ), complexation of  $\text{Ni}^{2+}$  and immobilization of His<sub>6</sub>-tagged proteins.

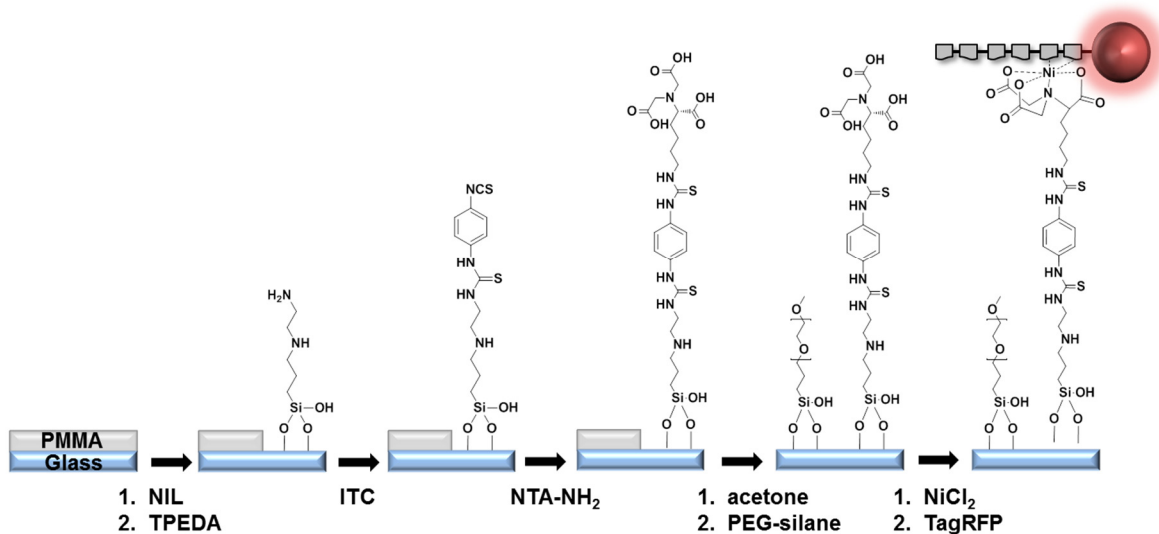

**Scheme S2.** Schematic representation of the patterning procedure using nanoimprint lithography (NIL) to generate Ni<sup>2+</sup>:NTA/PEG-line-patterns on poly(methyl methacrylate) (PMMA)-spincoated glass substrates. After NIL and removal of the residual PMMA layer the exposed areas of the glass substrate are functionalized with N-[3-(trimethoxysilyl)propyl]ethylenediamine (TPEDA, step 1) and the resulting amine-terminated monolayer reacted with p-phenylene diisothiocyanate (ITC, step 2). The resulting isothiocyanate layer is then functionalized with N<sub>α</sub>,N<sub>α</sub>-bis(carboxymethyl)-L-lysine (NTA-NH<sub>2</sub>, step 3). Then, the remaining PMMA is stripped and the exposed areas of bare glass are backfilled with 2-[methoxy(polyethyleneoxy)propyl]trimethoxysilane (PEG-silane, step 4) to prevent non-specific protein interactions with the bare substrate. Finally, NTA-terminated areas are complexed with Ni<sup>2+</sup> and His<sub>6</sub>-tagged proteins are immobilized (step 5).

As an example, the following equilibrium (Equation S1) and mass balances (Equation S2, S3) were used for a doubly His<sub>6</sub>-tagged TagRFP variant (**2H**):

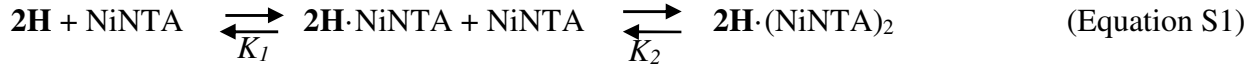

$$\theta_{\text{NiNTA}_{\text{tot}}}/\theta_{\text{tot}} = \theta_{\text{NiNTA}_{\text{free}}}/\theta_{\text{tot}} + \theta_{\mathbf{2H} \cdot \text{NiNTA}}/\theta_{\text{tot}} + \theta_{\mathbf{2H} \cdot (\text{NiNTA})_2}/\theta_{\text{tot}} \quad (\text{Equation S2})$$

$$[\mathbf{2H}]_{\text{tot}} = [\mathbf{2H}]_{\text{free}} + [\mathbf{2H}]_{\text{tot}} \theta_{\mathbf{2H} \cdot \text{NiNTA}}/\theta_{\text{tot}} + [\mathbf{2H}]_{\text{tot}} \theta_{\mathbf{2H} \cdot (\text{NiNTA})_2}/\theta_{\text{tot}} \quad (\text{Equation S3})$$

where  $\Theta$  is the absolute surface coverage in mol/unit area, while species in solution are given as concentrations in mol/L and with the corresponding equilibrium constants as follows:

$$K_1 = \frac{\theta_{\mathbf{2H} \cdot \text{NiNTA}}/\theta_{\text{tot}}}{[\mathbf{2H}] \cdot \theta_{\text{NiNTA}}/\theta_{\text{tot}}} = 2K_{i, \text{His}_6} \quad (\text{Equation S4})$$

$$K_2 = \frac{\theta_{\mathbf{2H} \cdot (\text{NiNTA})_2}/\theta_{\text{tot}}}{\theta_{\mathbf{2H} \cdot \text{NiNTA}}/\theta_{\text{tot}} \cdot \theta_{\text{NiNTA}}/\theta_{\text{tot}}} = \frac{1}{2} C_{\text{eff}} K_{i, \text{His}_6} \quad (\text{Equation S5})$$

Substituting Equations S4, S5 into Equations S2, S3 yields a set of numerically solvable equations with  $\theta_{\text{Ni(II)} \cdot \text{NTA}_{\text{tot}}}/\theta_{\text{tot}}$  as variable. Since the experiment was carried out under continuous flow conditions,  $[\mathbf{2H}]$  is assumed to be constant and equal to  $[\mathbf{2H}]_{\text{tot}}$ . The equations were solved in a spreadsheet approach.<sup>S4</sup>

Initially,  $K_{i, \text{His}_6}$  and the maximum SPR resonance angle shift ( $\Delta\alpha_{\text{max}}$ ) were iteratively optimized to fit the theoretical to the experimentally obtained values of SPR resonance shifts for **1H** binding to the Ni<sup>2+</sup>:NTA-functionalized surface. This  $K_{i, \text{His}_6}$  value (obtained for **1H**) was used as a fixed parameter for all the other variants during optimization, as it is assumed intrinsic to all His<sub>6</sub>-tags, while  $\Delta\alpha_{\text{max}}$  and  $C_{\text{eff}}$  were iteratively optimized for the other variants.



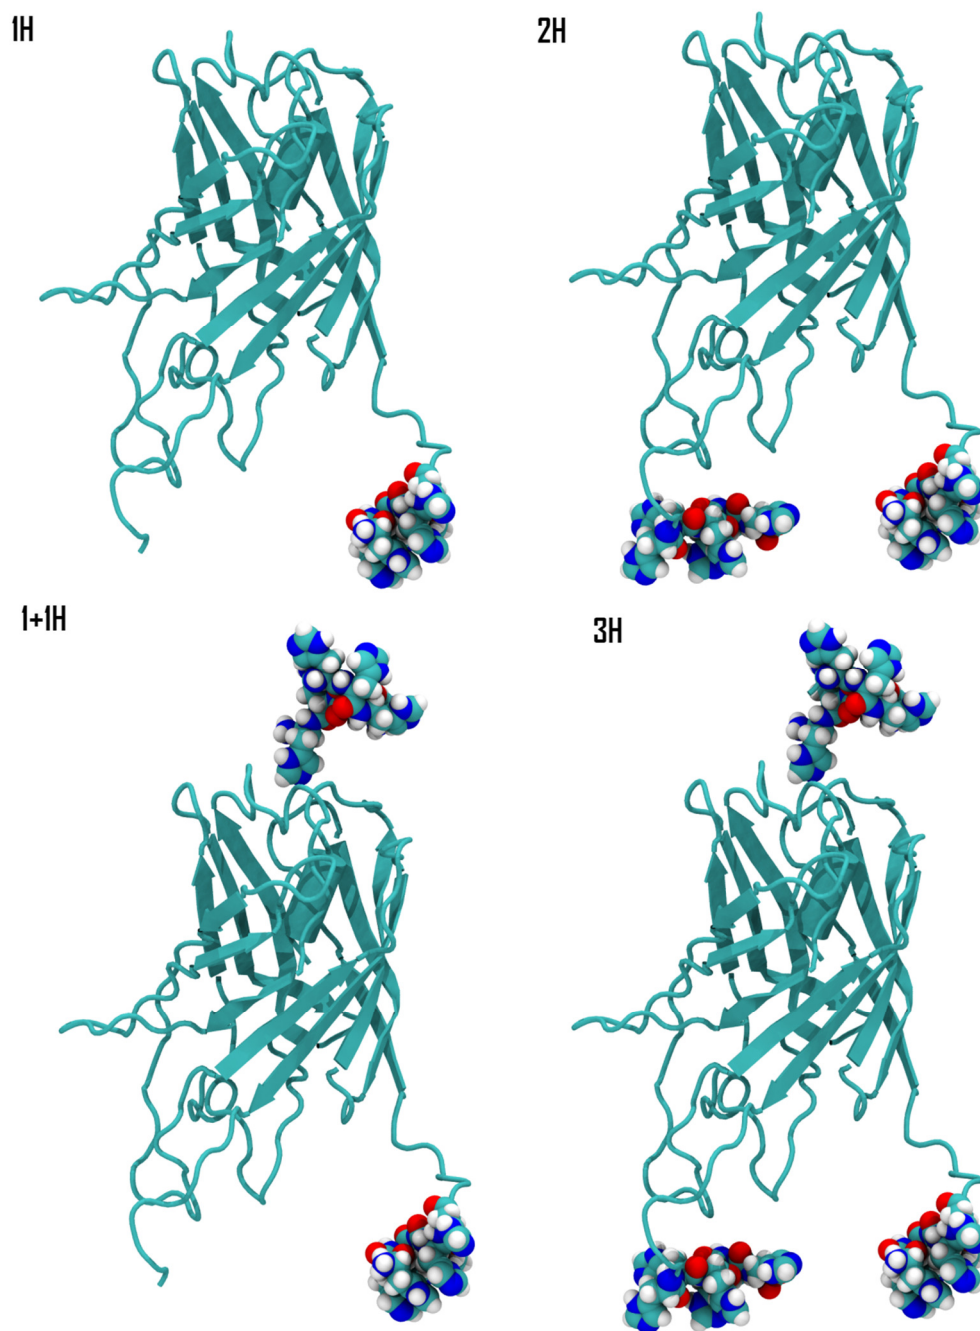

**Figure S2.** Schematic representation of TagRFP variants with the His<sub>6</sub>-tags that adsorb in each model (3H is the same as 2+1H).

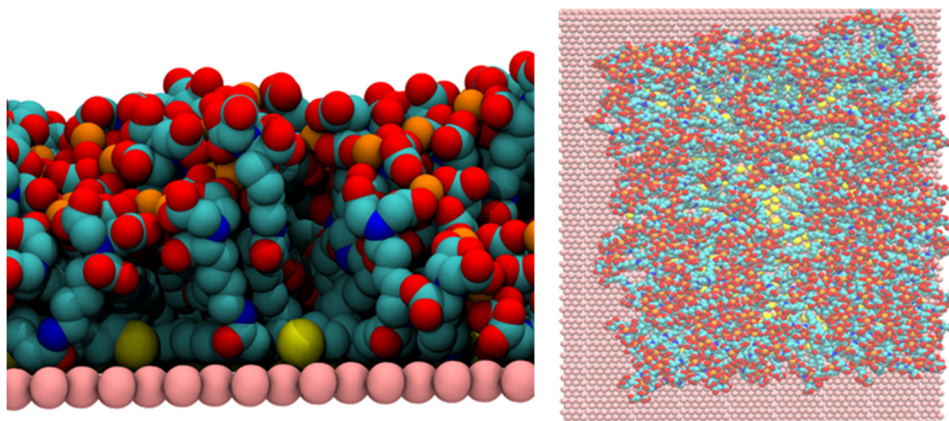

**Figure S3.** The computed  $\text{Ni}^{2+}$ :NTA-functionalized SAM viewed from the side (left) and top (right) with atoms shown as space-filling spheres.  $\text{Ni}^{2+}$  ions are colored in orange, oxygen atoms are red, nitrogen atoms are dark blue, carbon atoms are light blue, sulfur atoms are yellow and gold atoms are pink.

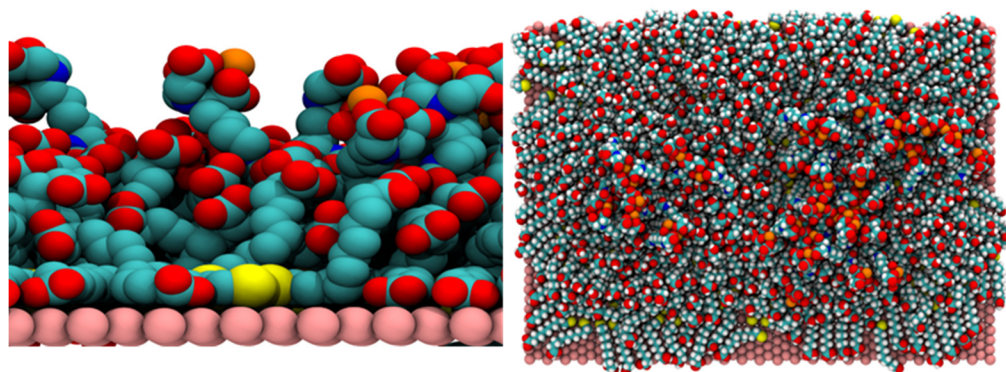

**Figure S4.** The computer mixed  $\text{Ni}^{2+}$ :NTA/acid-functionalized SAM viewed from the side (left) and top (right) with atoms shown as space-filling spheres.  $\text{Ni}^{2+}$  ions are colored in orange, oxygen atoms are red, nitrogen atoms are dark blue, carbon atoms are light blue, sulfur atoms are yellow and gold atoms are pink.

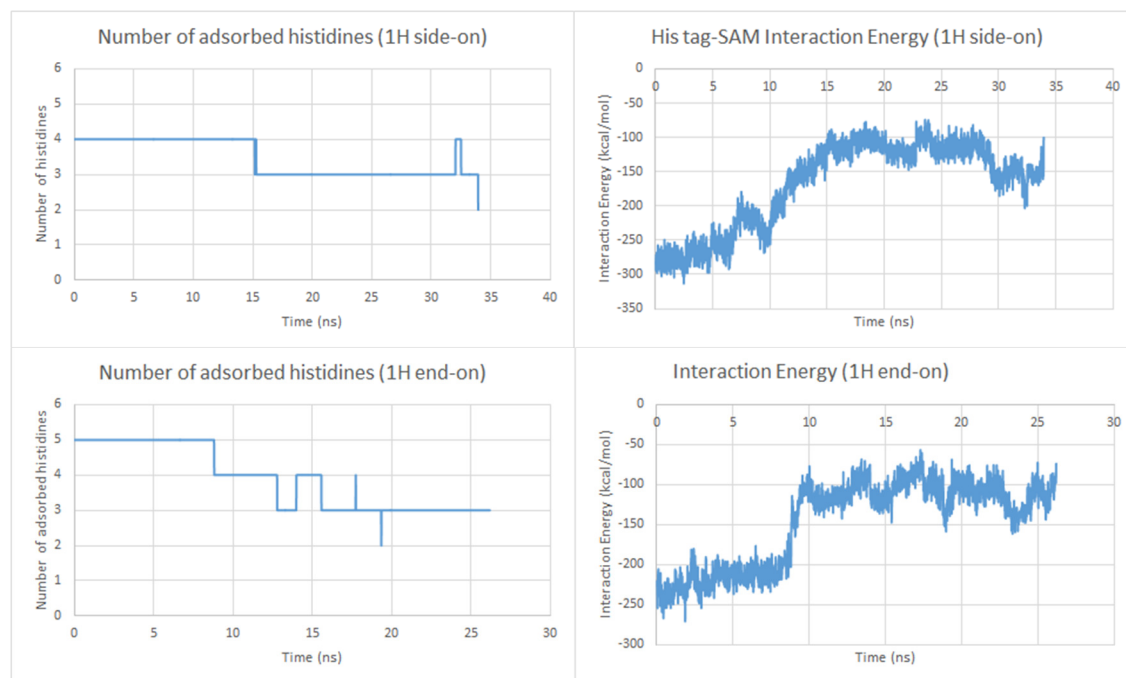

**Figure S5.** Computed timelines for number of complexed histidine residues and His<sub>6</sub>-tag-SAM interaction energy, for **1H** adsorbed on the mixed SAM in side-on and end-on orientations.

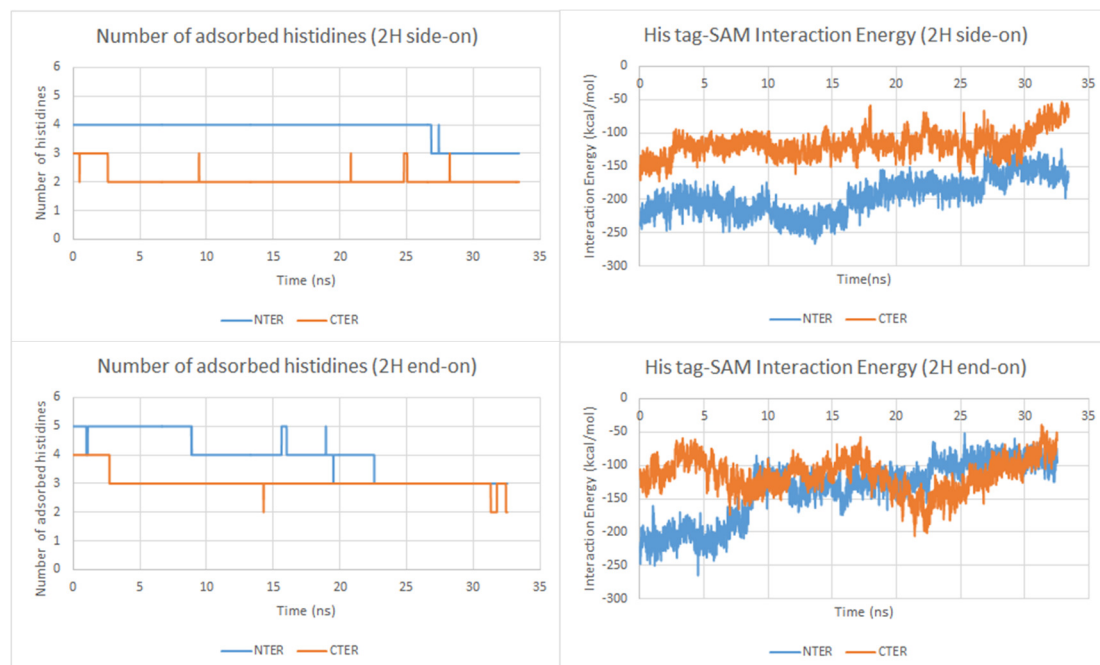

**Figure S6.** Computed timelines for number of complexed histidine residues and His<sub>6</sub>-tag-SAM interaction energy, for **2H** adsorbed on the mixed SAM in side-on and end-on orientations.

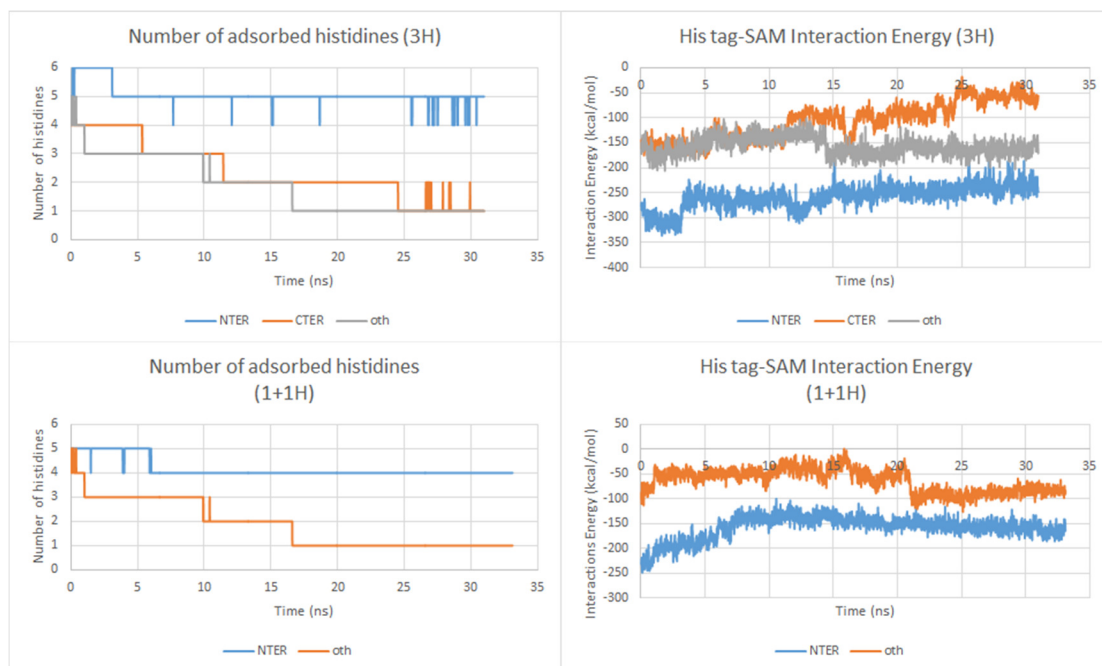

**Figure S7.** Computed timelines for number of complexed histidine residues and His<sub>6</sub>-tag-SAM interaction energy, for **3H (2+1H)** and **1+1H** adsorbed on the mixed SAM. Both use His tags at opposite ends of the protein and can only bind in a side-on orientation.

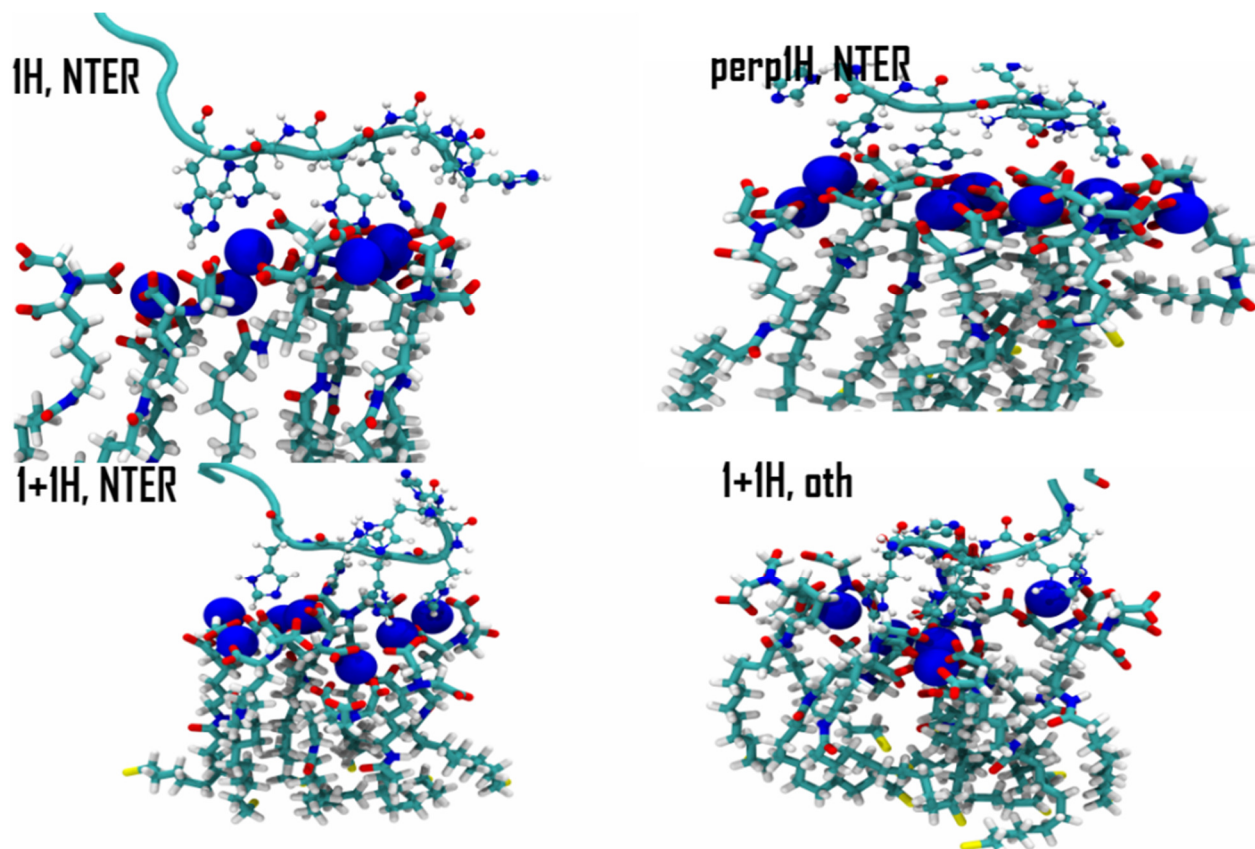

**Figure S8.** Final snapshots of the **1H** and **1+1H** His<sub>6</sub>-tags adsorbing onto the uniform Ni<sup>2+</sup>:NTA SAM. The SAM is in licorice representation, the His<sub>6</sub>-tag is in CPK representation, Ni<sup>2+</sup> ions are in space-filling representation. End-on oriented 1H is named “perp1H” in this Figure.



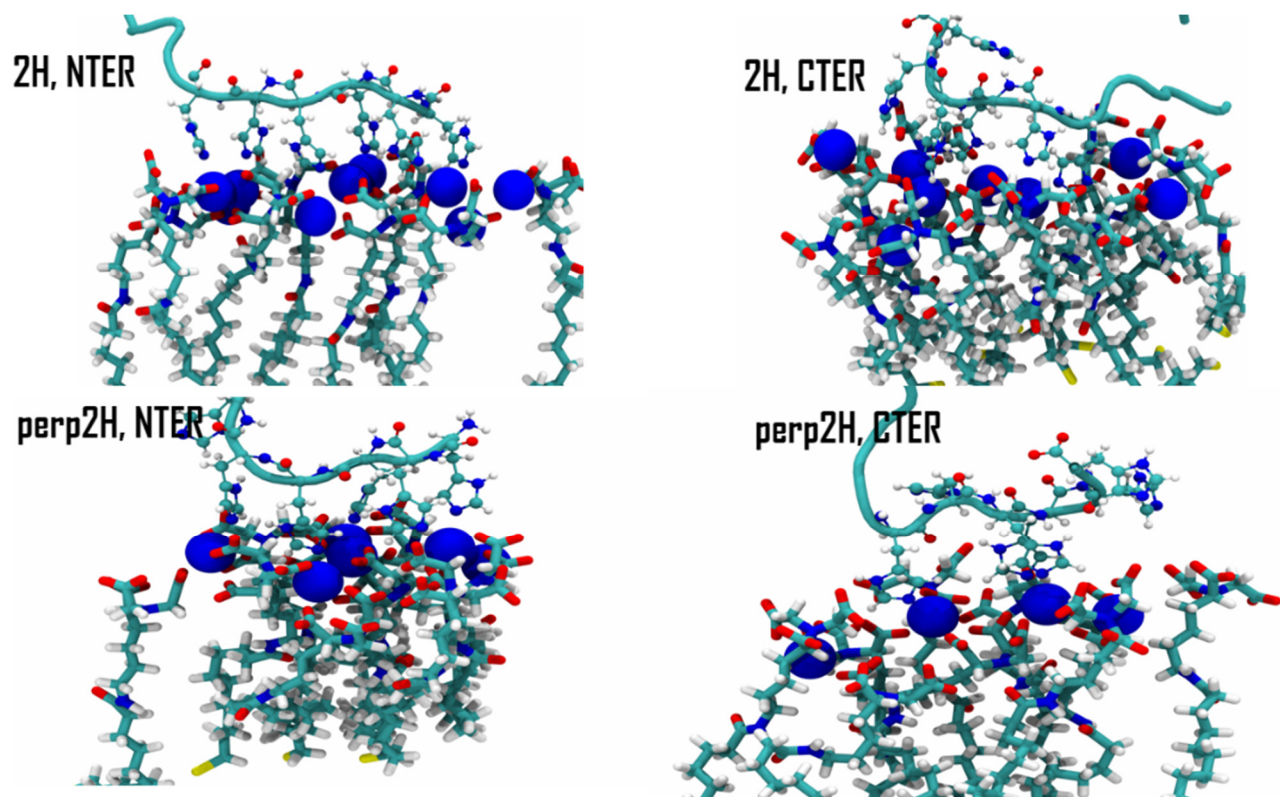

**Figure S9.** Final snapshots of the **2H** His<sub>6</sub>-tags adsorbing onto the uniform Ni<sup>2+</sup>:NTA SAM. The SAM is in liquorice representation, the His<sub>6</sub>-tag is in CPK representation, Ni<sup>2+</sup> ions are in space-filling representation. End-on oriented 2H is named “perp2H” in this Figure.

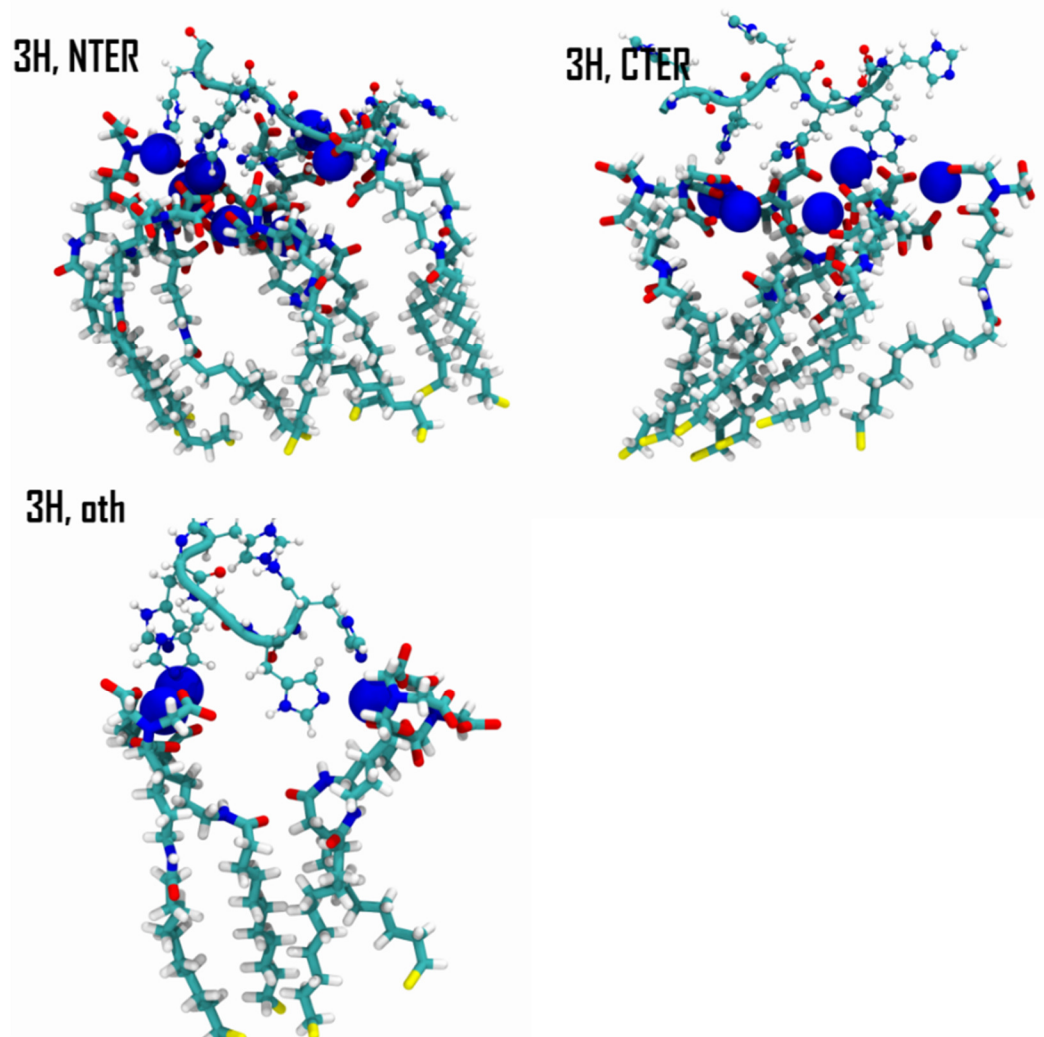

**Figure S10.** Final snapshots of the **3H (2+1H)** His<sub>6</sub>-tags adsorbing onto the uniform Ni<sup>2+</sup>:NTA SAM. The SAM is in liquorice representation, the His<sub>6</sub>-tag is in CPK representation, Ni<sup>2+</sup> ions are space-filling spheres.

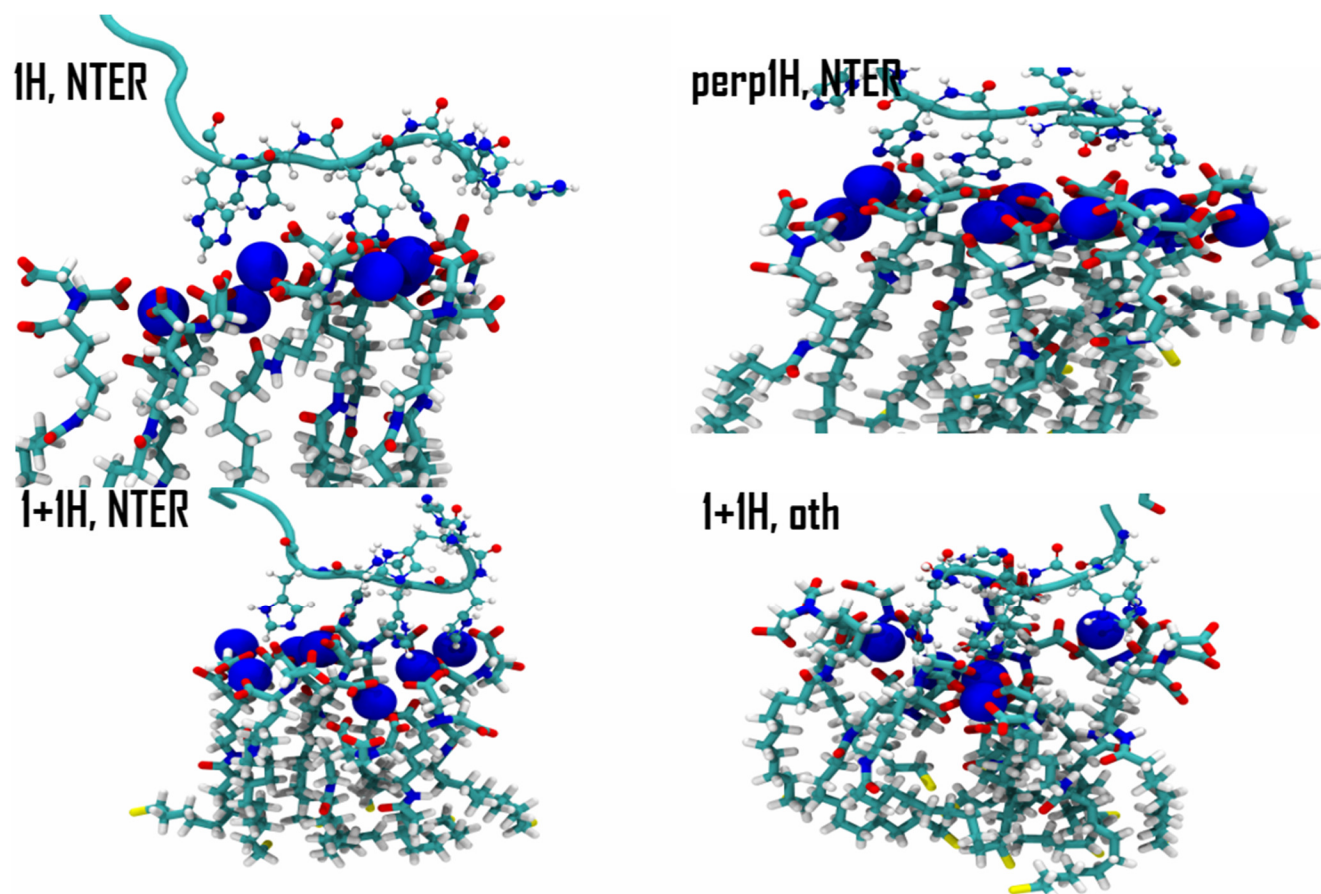

**Figure S11.** Final snapshots of the **1H** and **1+1H** His<sub>6</sub>-tags adsorbing onto the mixed Ni<sup>2+</sup>:NTA SAM. The SAM is in licorice representation, the His<sub>6</sub>-tag is in CPK representation, Ni<sup>2+</sup> ions are in space-filling representation. End-on oriented 1H is named “perp1H” in this Figure.



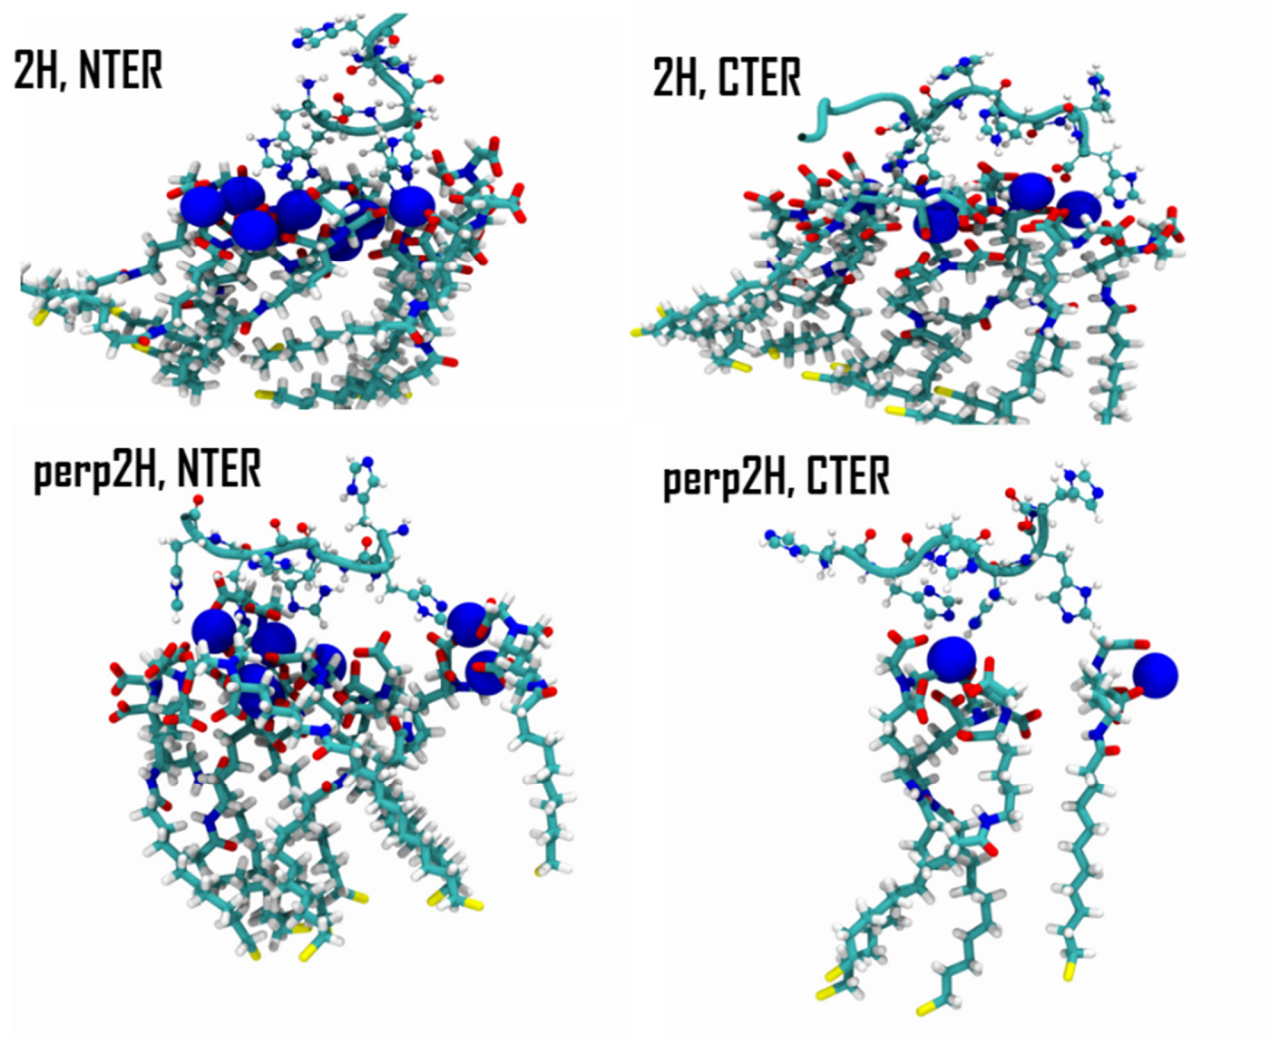

**Figure S12.** Final snapshots of the **2H** His<sub>6</sub>-tags adsorbing onto the mixed Ni<sup>2+</sup>:NTA SAM. The SAM is in liquorice representation, the His<sub>6</sub>-tag is in CPK representation, Ni<sup>2+</sup> ions are in space-filling representation. End-on oriented 2H is named “perp2H” in this Figure.

3H, NTER

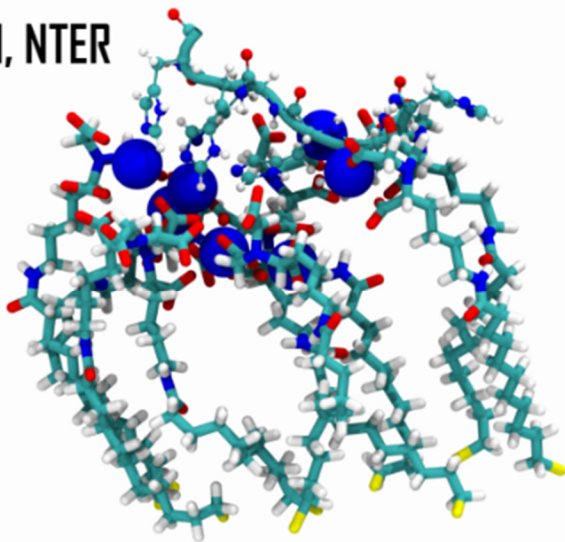

3H, CTER

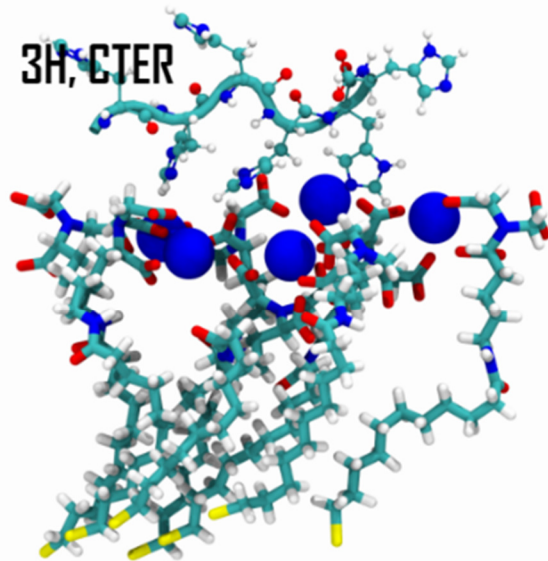

3H, oth

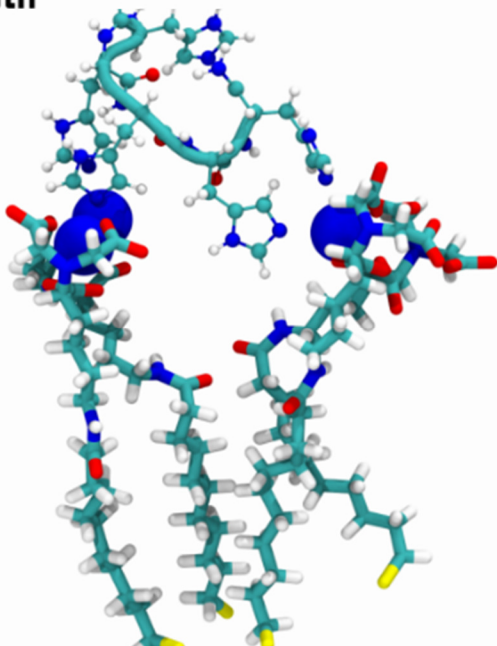

**Figure S13.** Final snapshots of the **3H (2+1H)** His<sub>6</sub>-tags adsorbing onto the mixed Ni<sup>2+</sup>:NTA SAM. The SAM is in liquorice representation, the His<sub>6</sub>-tag is in CPK representation, Ni<sup>2+</sup> ions are space-filling spheres.

**Table S4.** Calculated interaction energies for the uniform and mixed Ni<sup>2+</sup>:NTA SAMs.

| Variant<br>(orientation)        | Protein-SAM van der Waals (kcal/mol) |              | Protein-SAM Electrostatic (kcal/mol) |              | Total Protein-SAM (kcal/mol) |              | Protein-Water (kcal/mol) |              | Tag-SAM (kcal/mol) |              | Tag-Water (kcal/mol) |              | Total Interaction Energy (kcal/mol) |              |
|---------------------------------|--------------------------------------|--------------|--------------------------------------|--------------|------------------------------|--------------|--------------------------|--------------|--------------------|--------------|----------------------|--------------|-------------------------------------|--------------|
|                                 | <i>Uniform</i>                       | <i>Mixed</i> | <i>Uniform</i>                       | <i>Mixed</i> | <i>Uniform</i>               | <i>Mixed</i> | <i>Uniform</i>           | <i>Mixed</i> | <i>Uniform</i>     | <i>Mixed</i> | <i>Uniform</i>       | <i>Mixed</i> | <i>Uniform</i>                      | <i>Mixed</i> |
| <b>1H (side-on)</b>             | -44±7                                | -11±6        | -875±48                              | -187±71      | -919±47                      | -198±73      | -6666±211                | -6921±206    | -201±35            | -201±35      | -186±28              | -186±28      | -7972±221                           | -7506±223    |
| <b>2H (side-on)</b>             | -59±8                                | -12±5        | -1118±51                             | -149±76      | -1177±52                     | -161±74      | -6458±172                | -7024±204    | -402±49            | -402±49      | -372±40              | -372±40      | -8409±190                           | -7959±226    |
| <b>2+1H(side-on)</b>            | -62±8                                | -31±7        | -1057±82                             | -394±42      | -1119±80                     | -425±42      | -6814±260                | -6527±177    | -603±57            | -603±57      | -570±48              | -570±48      | -9104±204                           | -8090±200    |
| <b>1+1H(side-on)</b>            | -40±8                                | -32±7        | -673±56                              | -274±68      | -713±57                      | -306±69      | -6519±179                | -6913±187    | -402±49            | -402±49      | -372±40              | -372±40      | -8006±198                           | -7980±200    |
| <b>1H (end-on)</b>              | -0.02±0.01                           | -0.1±0.1     | 0.08±0.9                             | 6±11         | 0.06±0.9                     | 6±10         | -7231±252                | -6882±167    | -201±35            | -201±35      | -186±28              | -186±28      | -7618±256                           | -7263±173    |
| <b>2H (end-on)</b>              | -0.3±0.2                             | -0.9±0.9     | 3±5                                  | -17±19       | 3±5                          | -18±19       | -7662±186                | -7108±177    | -402±49            | -402±49      | -372±40              | -372±40      | -8433±197                           | -7900±189    |
| <b>Ref. His<sub>6</sub> tag</b> | -178±34                              | -178±34      | -23±5                                | -23±5        | -201±35                      | -201±35      | -186±28                  | -186±28      | -201±35            | -201±35      | -186±28              | -186±28      | -387±45                             | -387±45      |

**Table S5.** Number of water molecules within 10Å of the protein when bound to the mixed SAM.

| <b>Variant</b>                | <b>Solvated Protein</b> | <b>Side-on 1H</b> | <b>Side-on 2H</b> | <b>Side-on 2+1H</b> | <b>Side-on 1+1H</b> | <b>End-on 1H</b> | <b>End-on 2H</b> |
|-------------------------------|-------------------------|-------------------|-------------------|---------------------|---------------------|------------------|------------------|
| <b>No. of Water Molecules</b> | 3720                    | 3350              | 3550              | 3400                | 3370                | 3570             | 3700             |

**Table S6.** Conformational energies and protein radii of gyration when bound to the uniform SAM (excluding the His<sub>6</sub>-tags) and the corresponding values for reference unbound protein.

|                               | <b>Solvated Protein</b> | <b>Side-on 1H</b> | <b>Side-on 2H</b> | <b>Side-on 2+1H</b> | <b>Side-on 1+1H</b> | <b>End-on 1H</b> | <b>End-on 2H</b> |
|-------------------------------|-------------------------|-------------------|-------------------|---------------------|---------------------|------------------|------------------|
| <b>Energy (kcal/mol)</b>      | 4720±40                 | 4770±50           | 4800±50           | 4750±50             | 4770±50             | 4750±50          | 4730±50          |
| <b>Radius of gyration (Å)</b> | 18.5±0.1                | 18.4±0.1          | 18.3±0.1          | 18.4±0.1            | 18.3±0.1            | 18.1±0.1         | 18.9±0.1         |

**Table S7.** Conformational energies and protein radii of gyration when bound to the mixed SAM (excluding the His<sub>6</sub>-tags).

|                        | Side-on 1H | Side-on 2H | Side-on 2+1H | Side-on 1+1H | End-on 1H | End-on 2H |
|------------------------|------------|------------|--------------|--------------|-----------|-----------|
| Energy (kcal/mol)      | 4770±40    | 4700±40    | 4700±50      | 4690±40      | 4680±40   | 4690±40   |
| Radius of gyration (Å) | 18.1±0.1   | 18.3±0.1   | 18.4±0.0     | 18.4±0.1     | 18.2±0.1  | 18.4±0.1  |

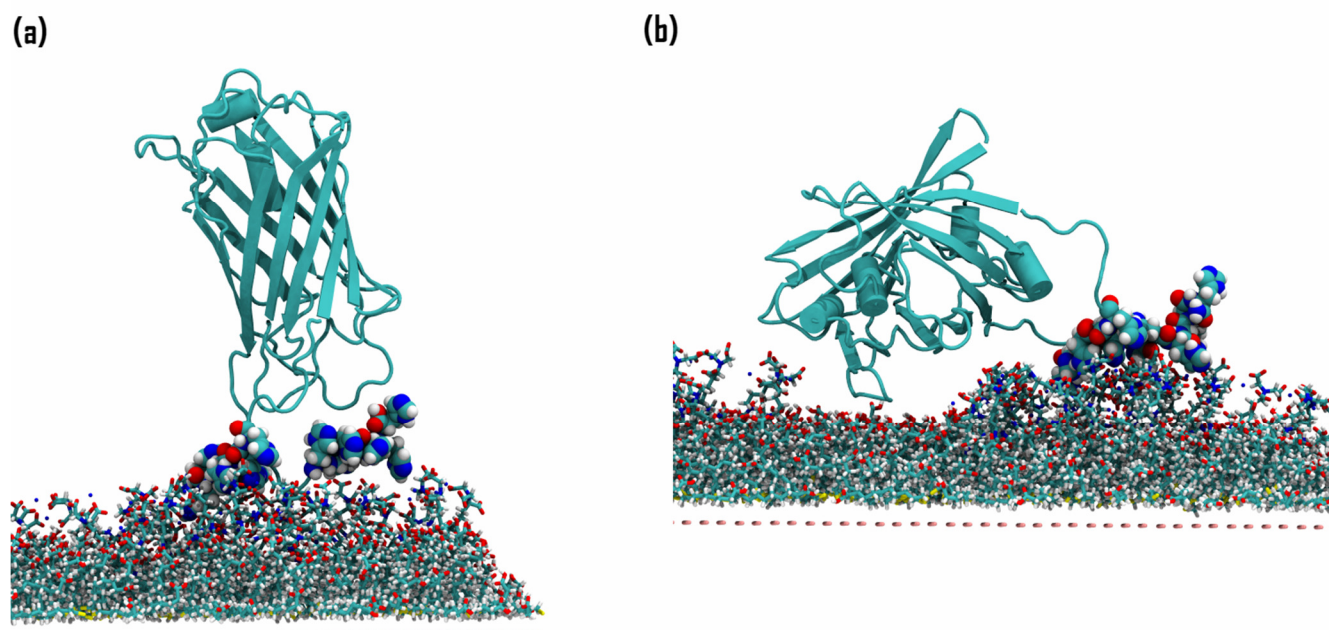

**Figure S14.** The starting bound configurations used for SMD simulations of 2H unbinding from (a) end-on and (b) side-on orientations on a mixed SAM.

### A) 2H

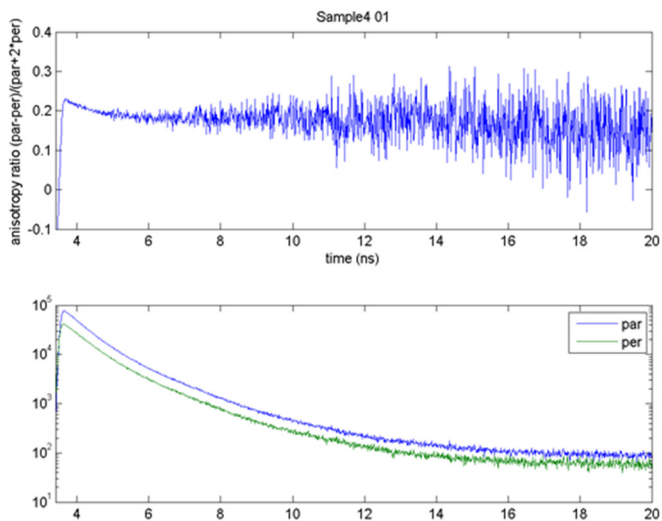

### B) 2+1H

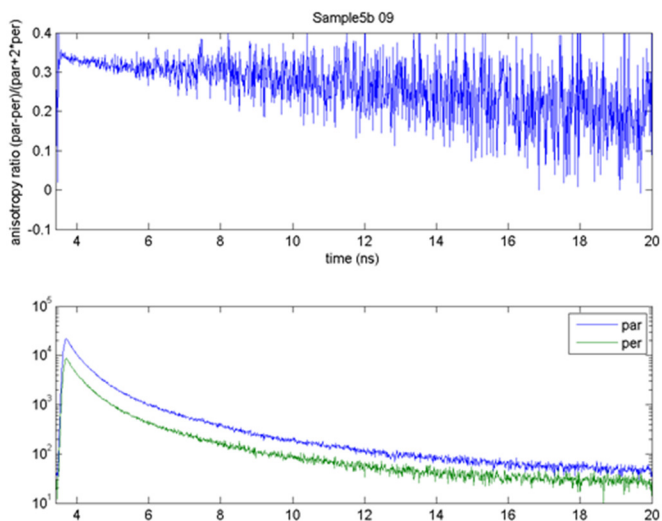

**Figure S15.** Anisotropy decay (top) and time traces for parallel and perpendicular polarization for immobilized protein **2H** (A) and **2+1H** (B).
